# Supplementary material
Source: PubMed Central journal article supplement (PMC4023864)

**A**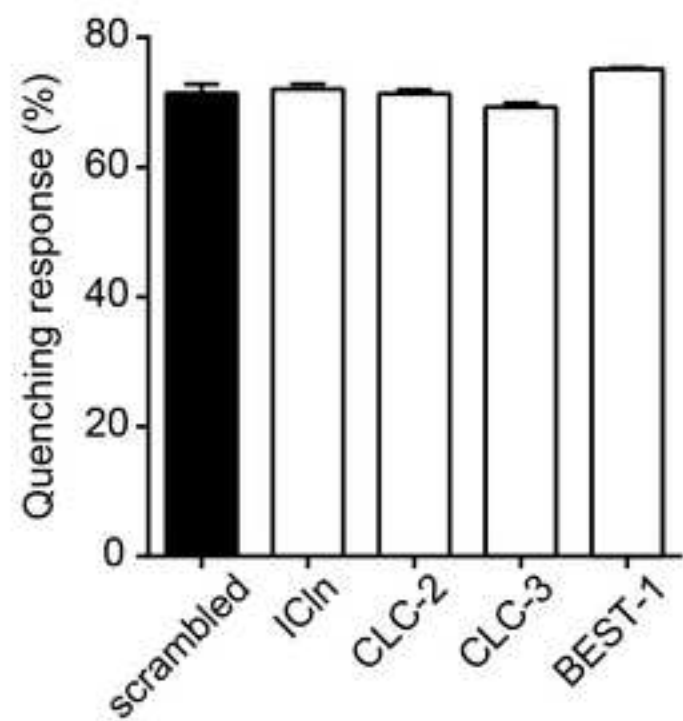**B**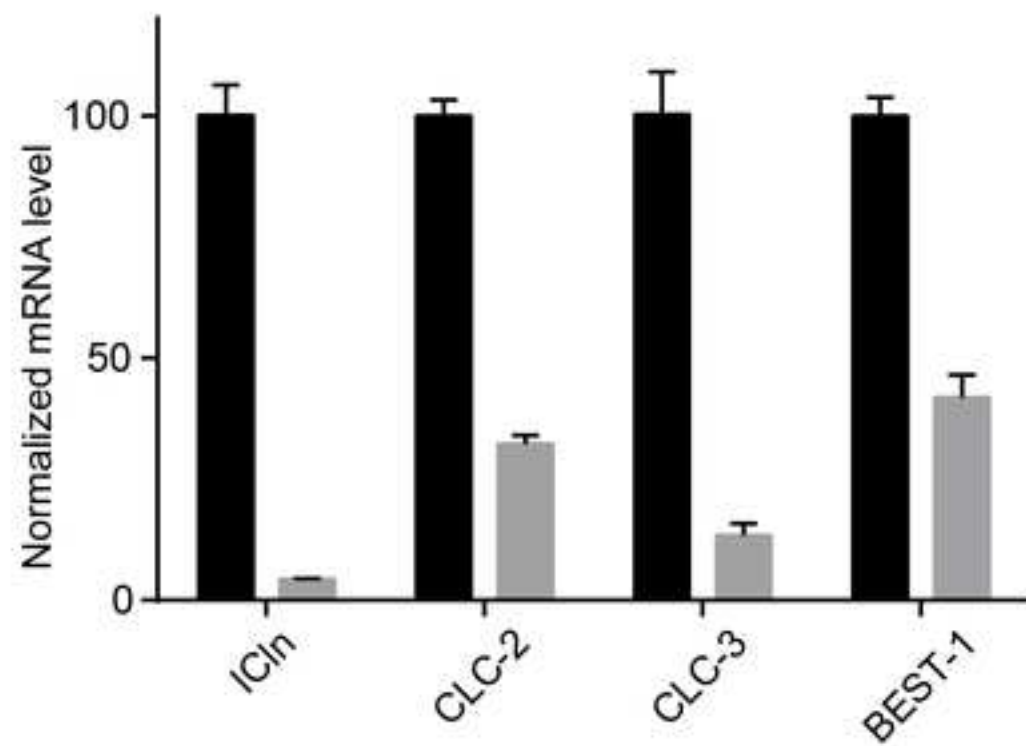

**A**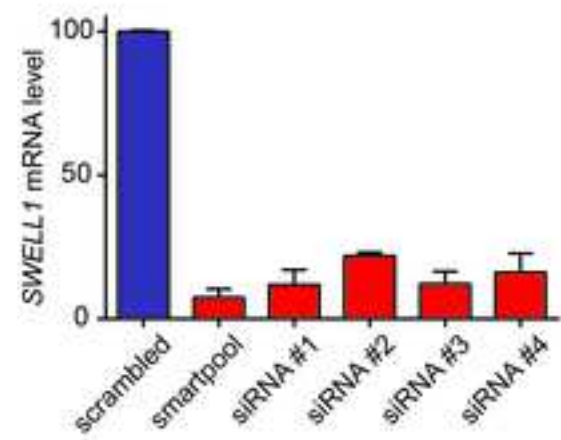**B**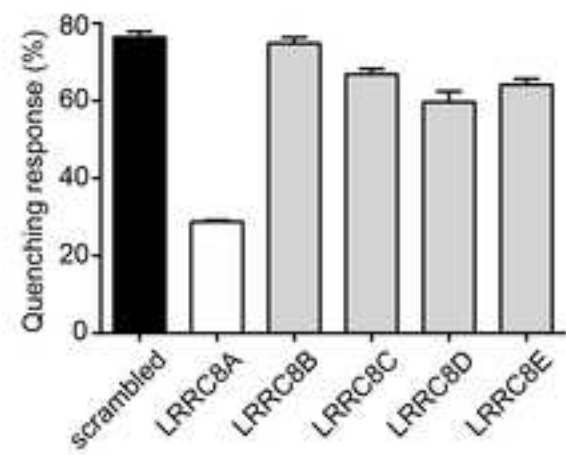**C**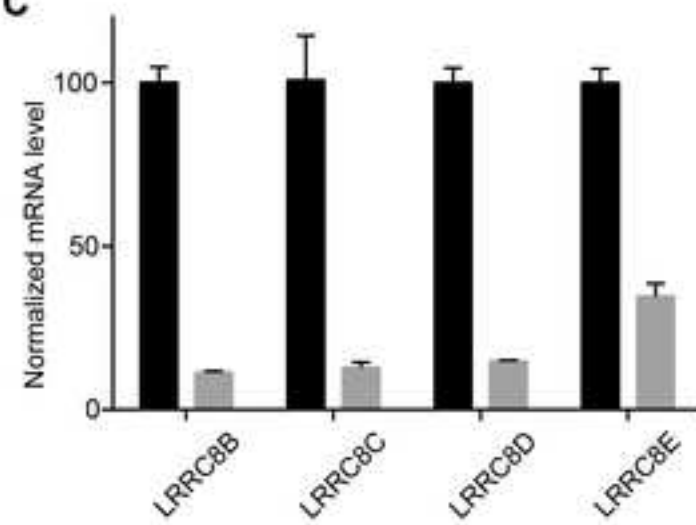

**HEK293T**

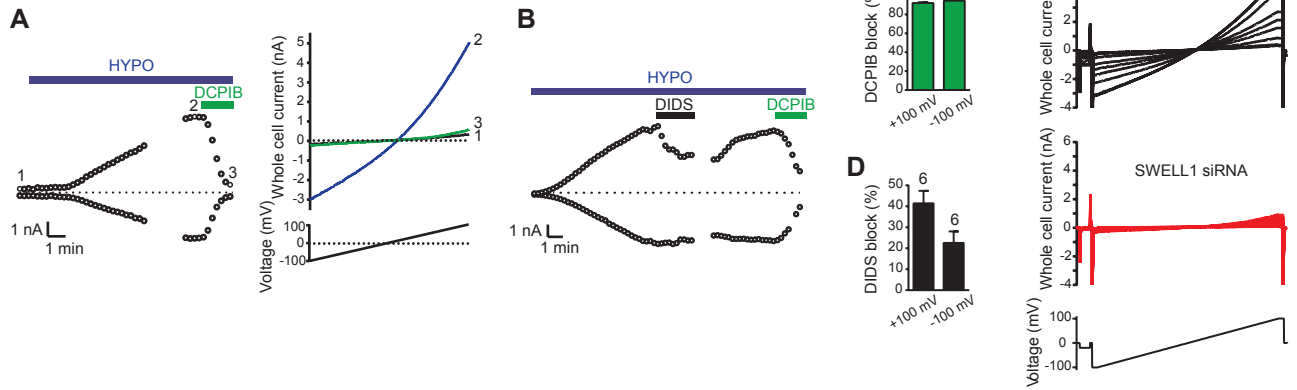

**HeLa**

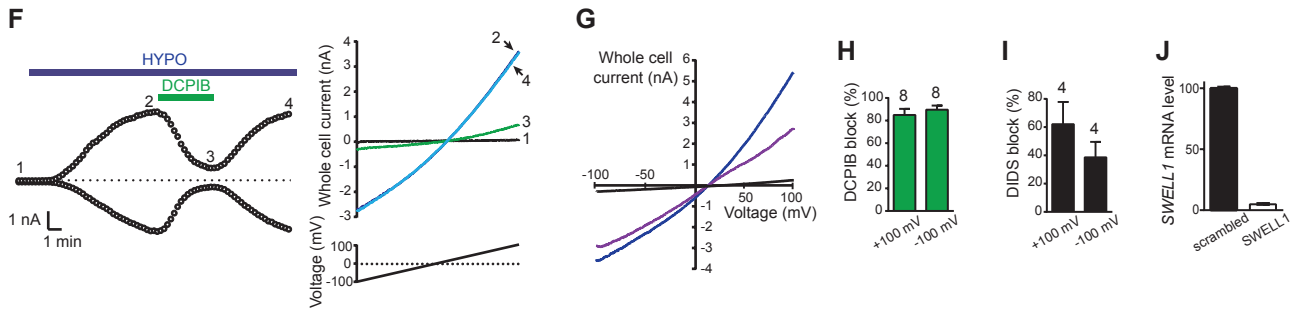

**T lymphocytes**

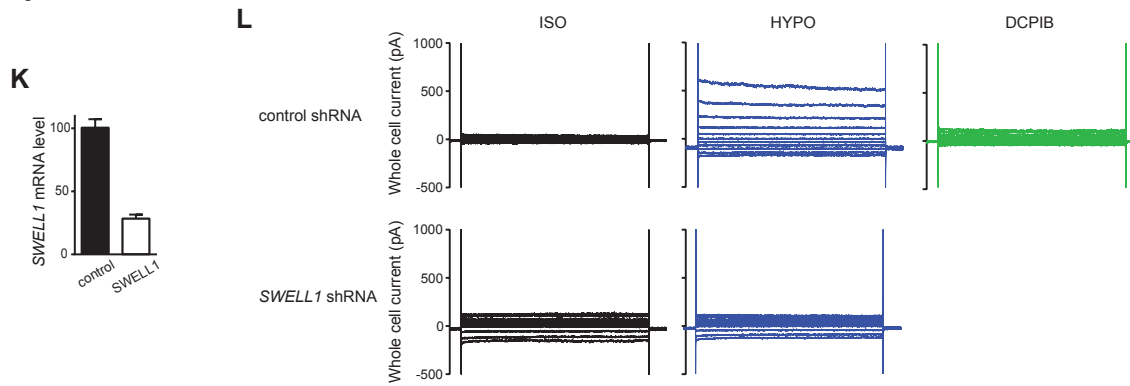

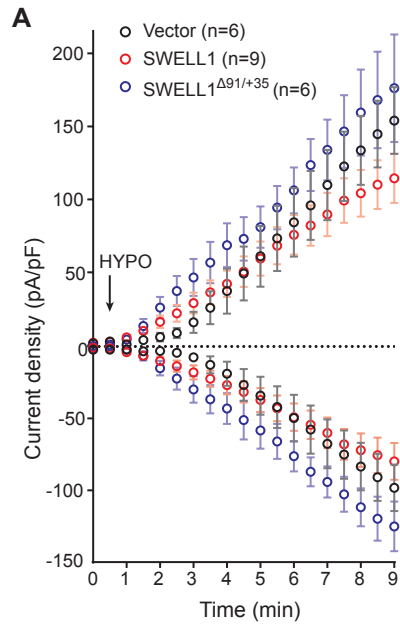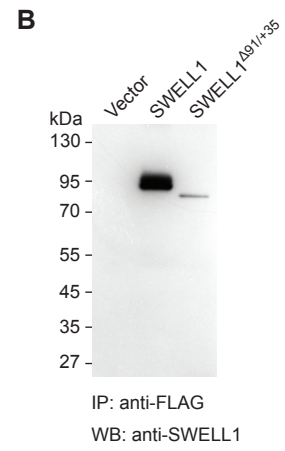

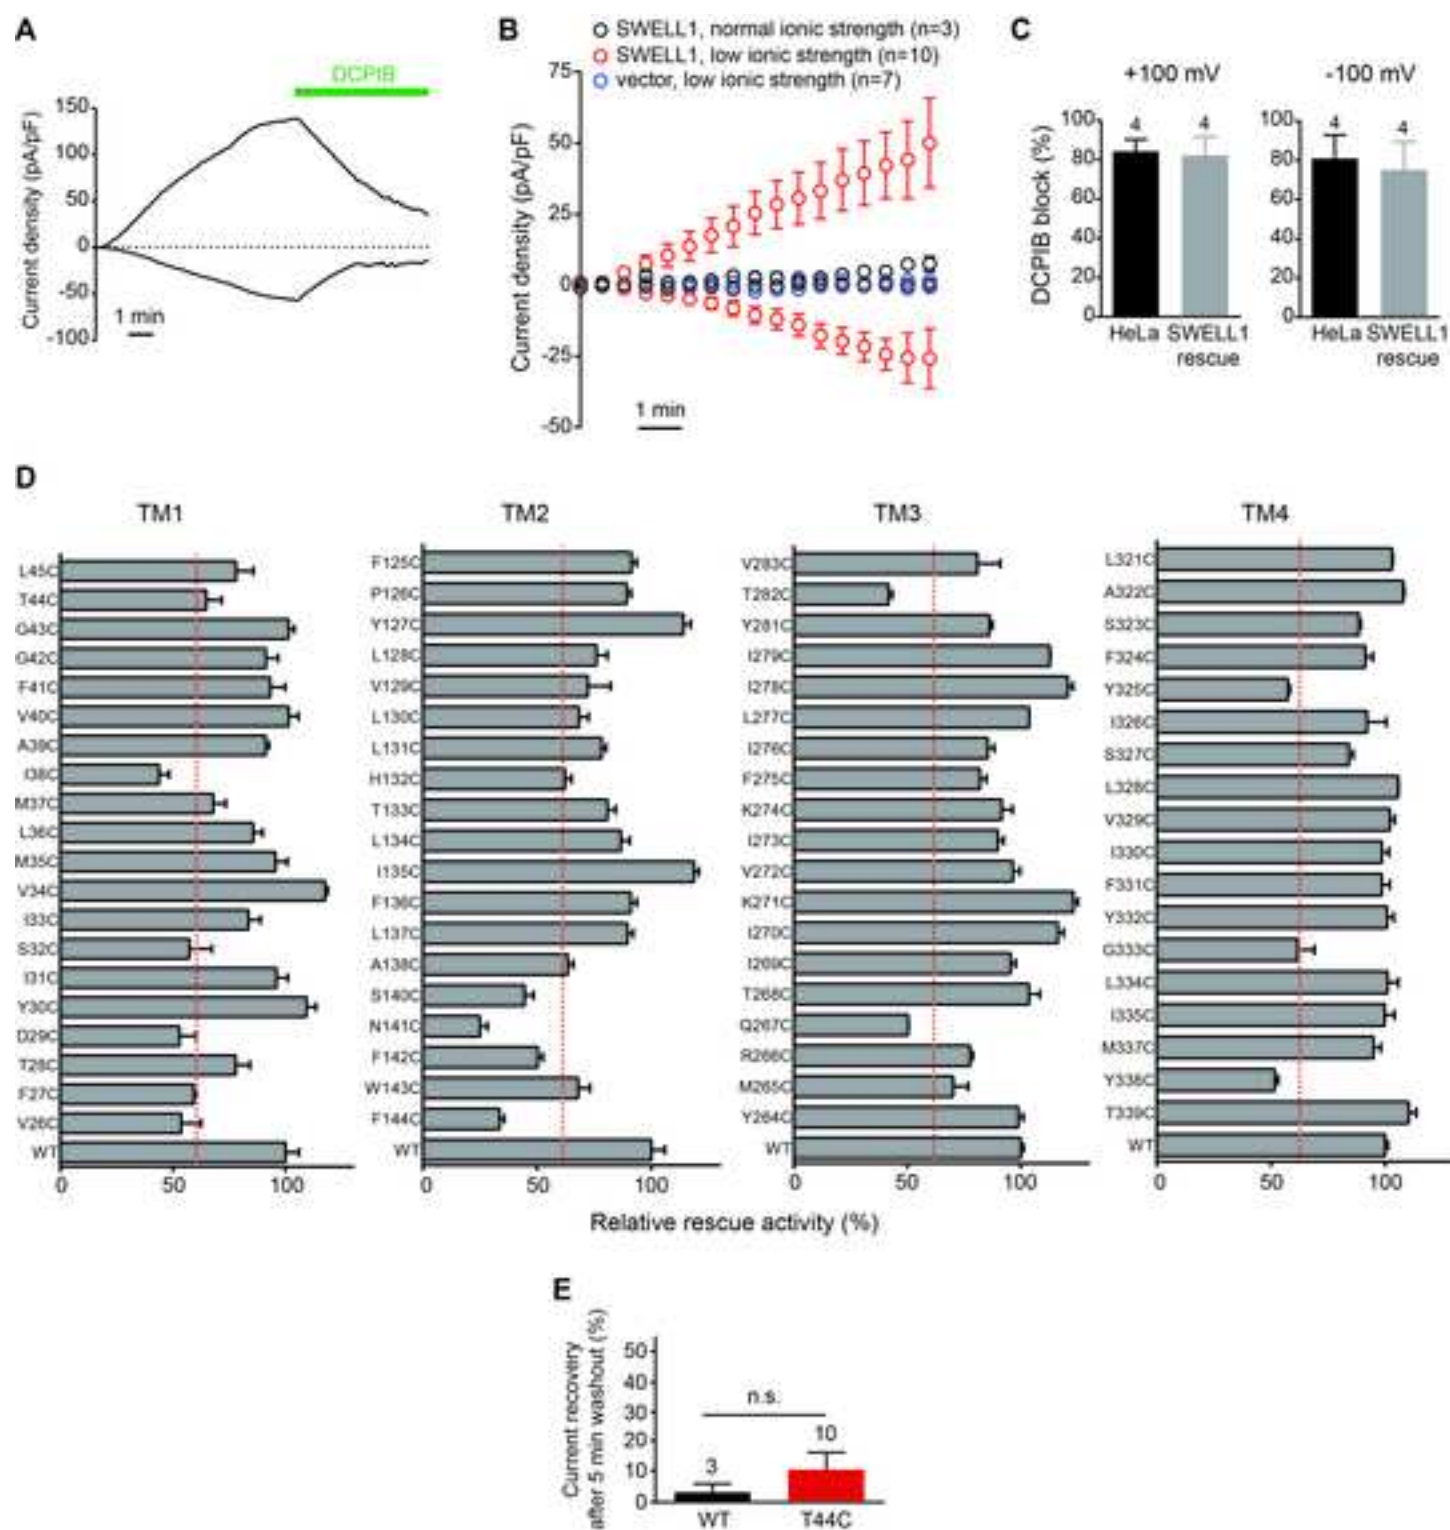

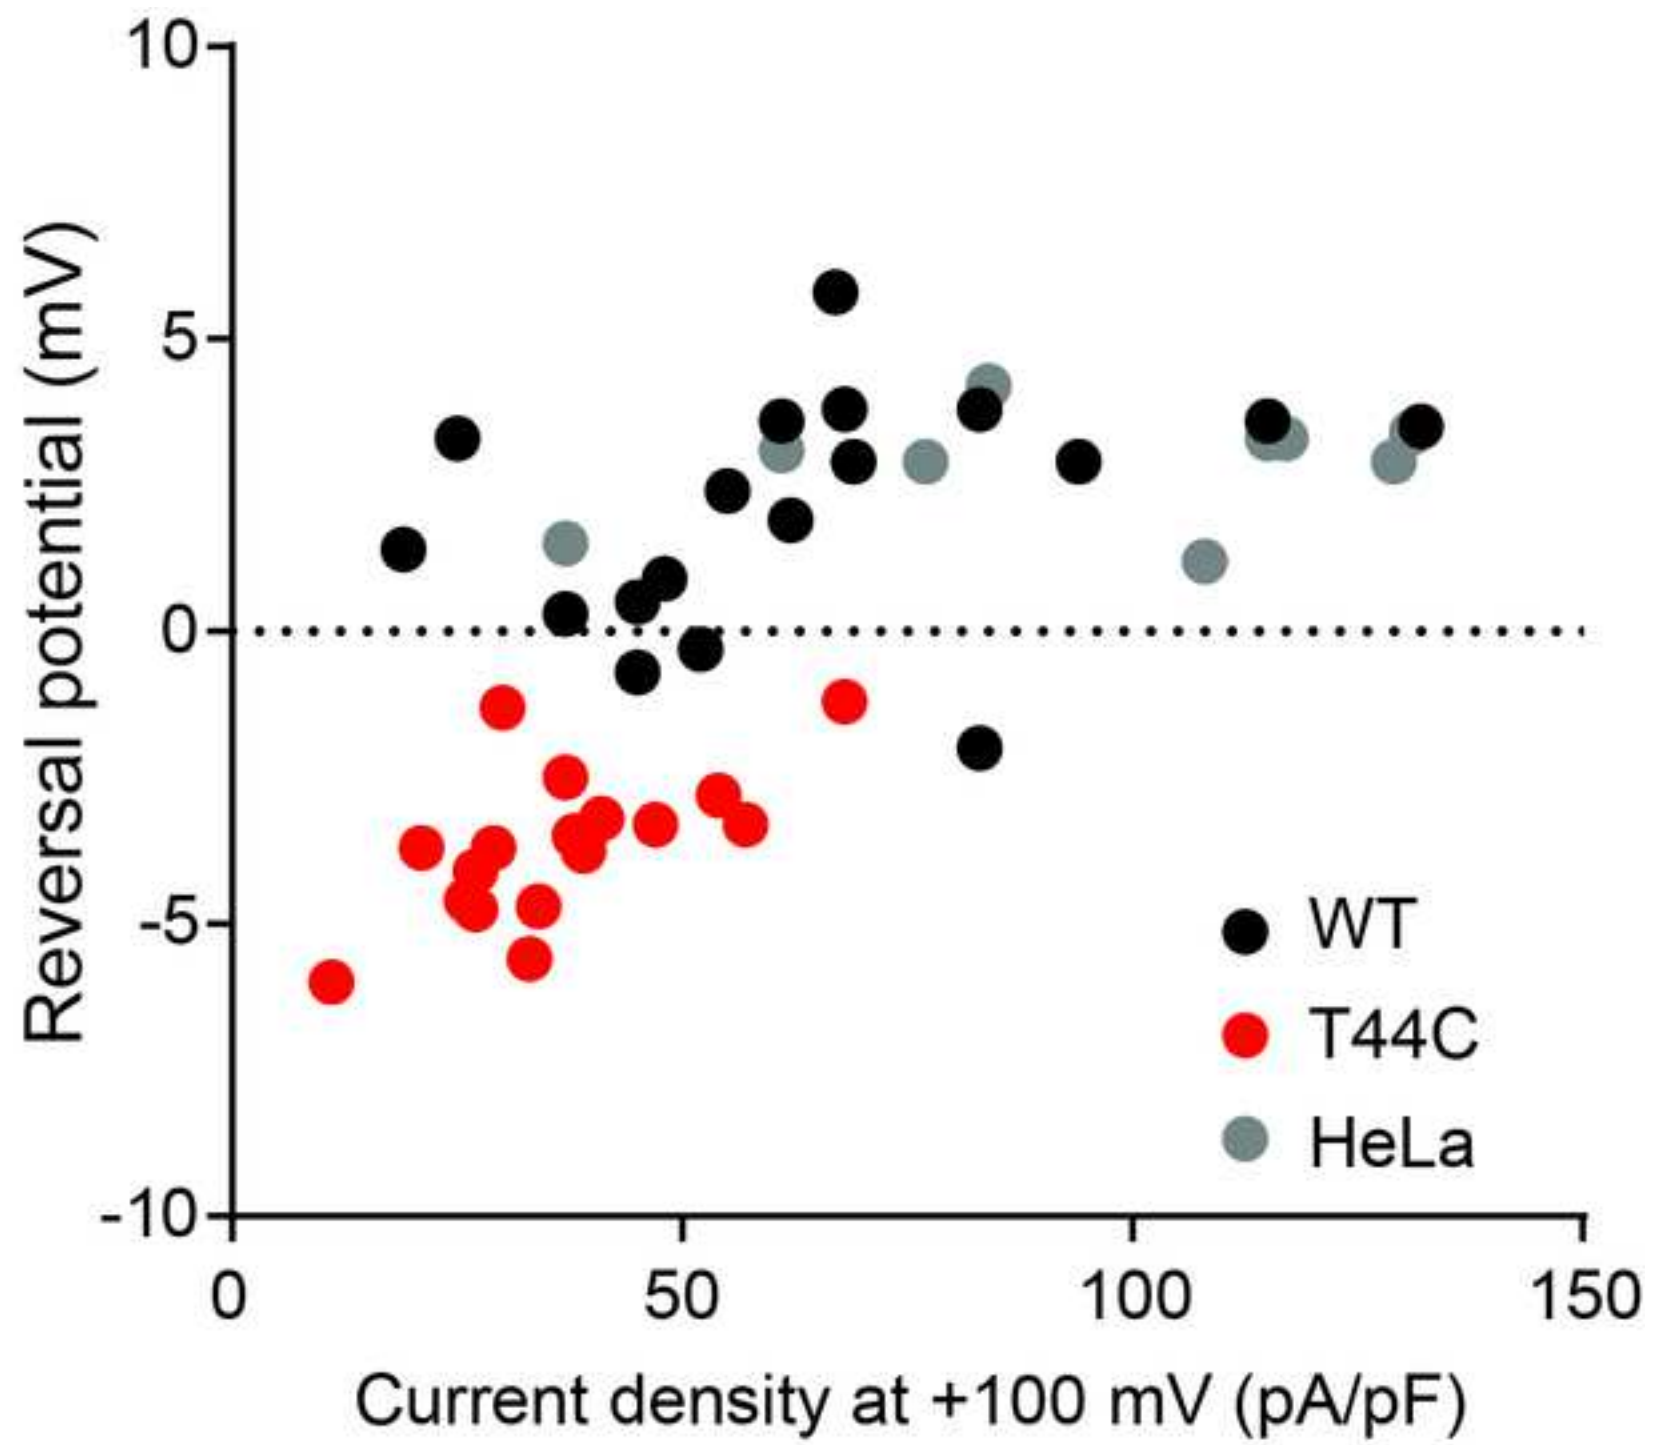

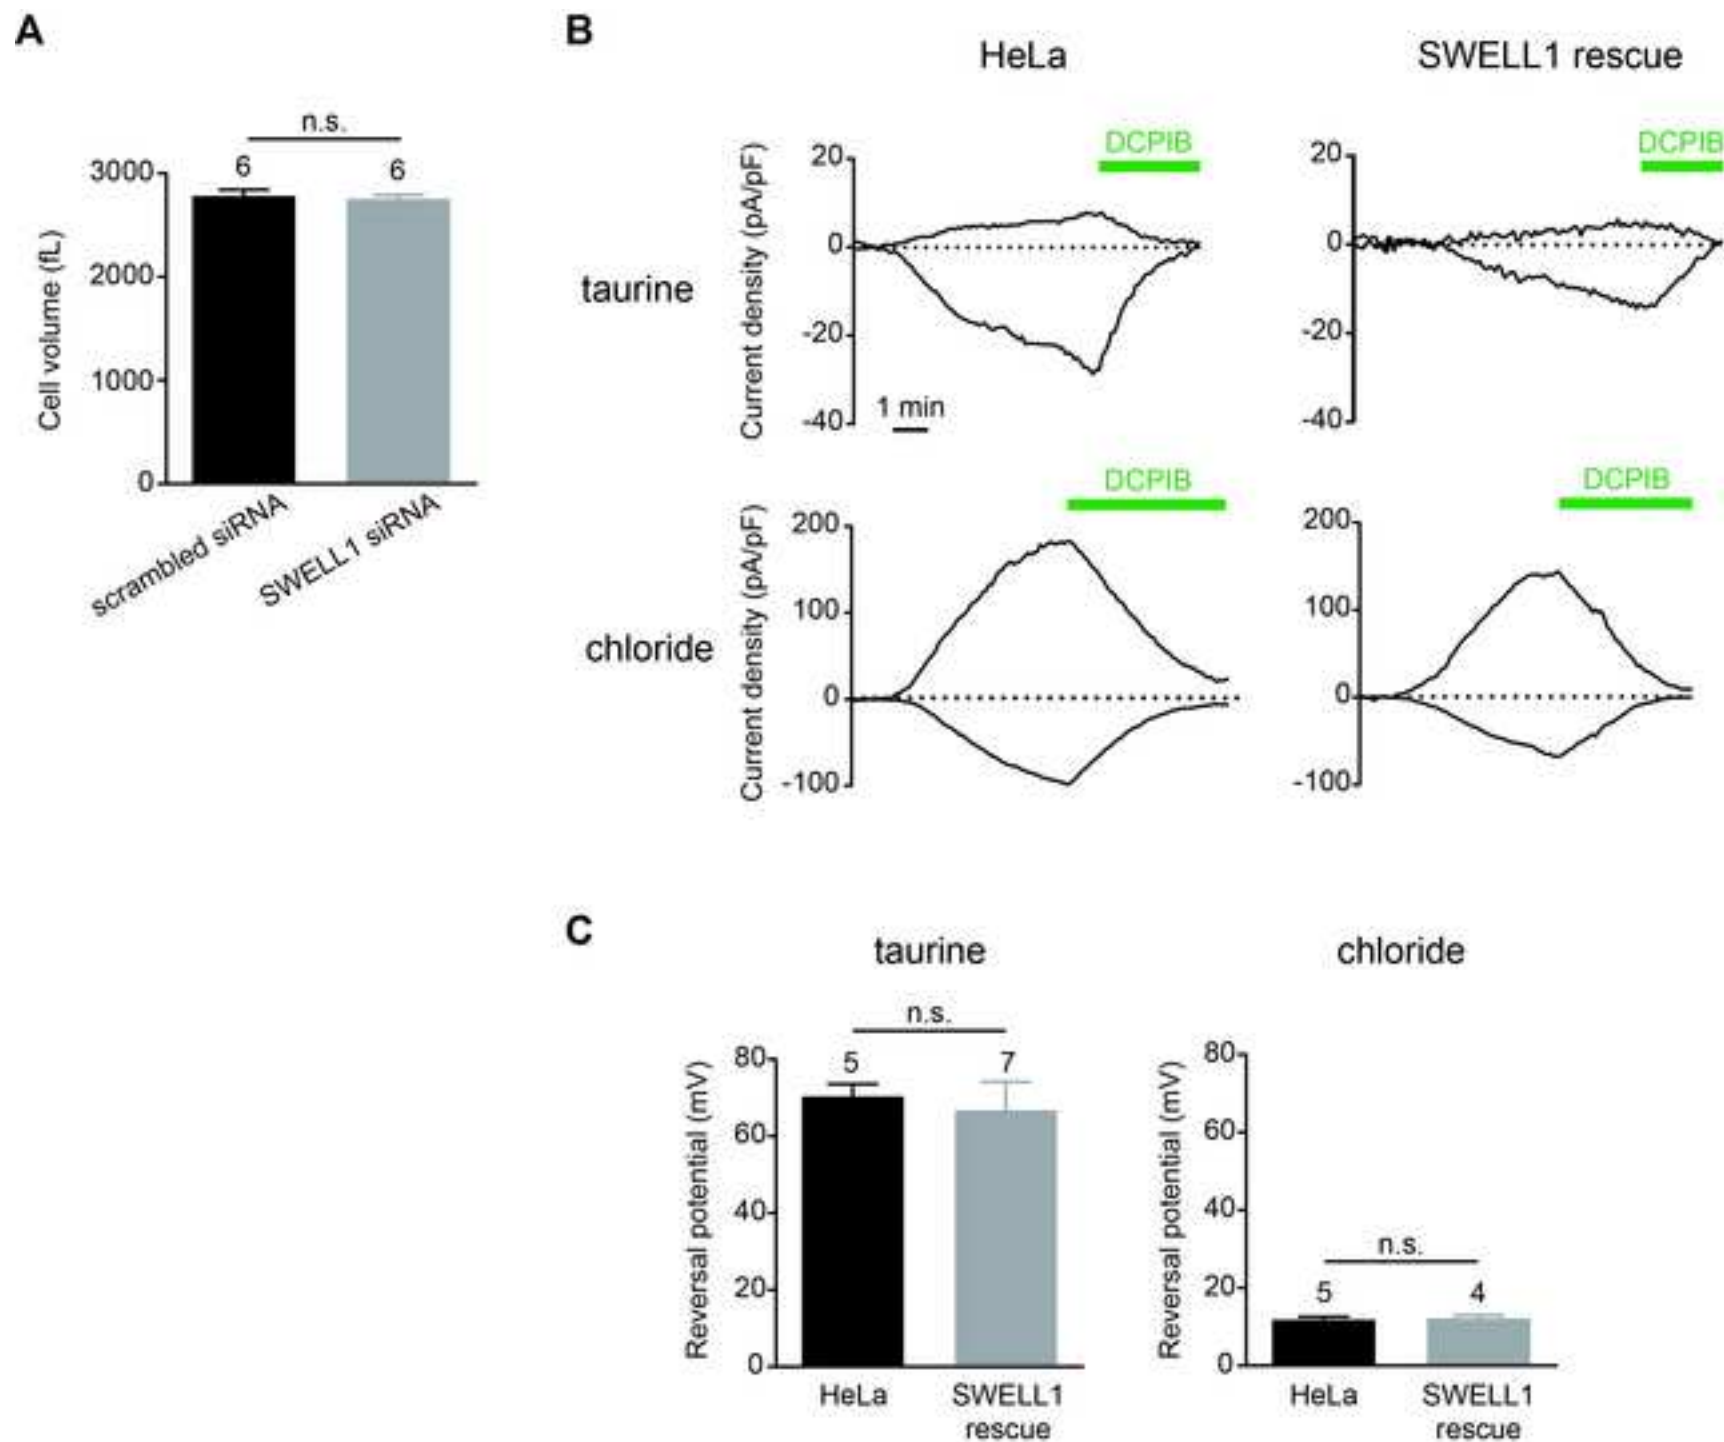

Supplement: NIHMS579222-supplement-02.pdf [file NIHMS579222-supplement-02.pdf]
